# Supplementary material for: The Influence of Depression on Biased Diagnosis of Premenstrual Syndrome and Premenstrual Dysphoric Disorder by the PSST Inventory
Source: MDPI journal article supplement (doi:10.3390/life11111278), 2021-11-22
Supplement: s1 [file s1]

# The Influence of Depression on Biased Diagnosis of Premenstrual Syndrome and Premenstrual Dysphoric Disorder by the PSST Inventory

Andrzej Śliwerski \* and Karolina Koszałkowska

Institute of Psychology, University of Łódź, 90-136 Łódź, Poland; karolina.koszalkowska@uni.lodz.pl

\* Correspondence: andrzej.sliwerski@uni.lodz.pl

**Table S1.** Descriptive statistics for study sample.

|                              | Without depression                  |                 |                  |                               | With depression                 |                  |                  |                              |
|------------------------------|-------------------------------------|-----------------|------------------|-------------------------------|---------------------------------|------------------|------------------|------------------------------|
|                              | Without<br>PMS/PM<br>DD<br>(N = 58) | PMS<br>(N = 52) | PMDD<br>(N = 14) | Statistical<br>test (df)      | Without<br>PMS/PMDD<br>(N = 34) | PMS<br>(N = 48)  | PMDD<br>(N = 9)  | Statistical<br>test          |
| Mean age                     | 24.79<br>(3.04)                     | 24.77<br>(3.44) | 23.21<br>(3.09)  | F =<br>1.472(123)<br>p > 0.05 | 23.82<br>(3.25)                 | 24.29<br>(3.53)  | 22.33<br>(2.70)  | F =<br>1.315(90)<br>P > 0.05 |
| Mean cycle<br>length         | 28.60<br>(2.26)                     | 28.73<br>(2.61) | 28.64<br>(2.70)  | F =<br>0.037(123)<br>p > 0.05 | 28.50<br>(2.94)                 | 28.83<br>(2.28)  | 28.00<br>(3.00)  | F =<br>0.447(90)<br>P > 0.05 |
| CES-D                        | 14.45<br>(9.88)                     | 16.52<br>(8.84) | 17.29<br>(9.29)  | F =<br>0.910(123)<br>p > 0.05 | 23.62<br>(12.24)                | 26.13<br>(11.61) | 28.67<br>(14.41) | F =<br>0.779(90)<br>P > 0.05 |
| OC (n)                       | 13                                  | 11              | 1                | $\chi^2 =$<br>1.473(1)        | 7                               | 16               | 1                | $\chi^2 =$<br>2.523(1)       |
| No OC (n)                    | 45                                  | 41              | 13               | p > 0.05                      | 27                              | 32               | 8                | p > 0.05                     |
| Psychiatric<br>treatment (n) | 2                                   | 1               | 2                | $\chi^2 =$<br>3.717(1)        | 7                               | 11               | 4                | $\chi^2 =$<br>2.286(1)       |

|               |   |   |   |            |   |    |   |            |
|---------------|---|---|---|------------|---|----|---|------------|
|               |   |   |   | p > 0.05   |   |    |   | p > 0.05   |
|               |   |   |   | $\chi^2 =$ |   |    |   | $\chi^2 =$ |
| Psychotherapy | 4 | 1 | 1 | 1.992(1)   | 8 | 13 | 0 | 2.986(1)   |
| (n)           |   |   |   | p > 0.05   |   |    |   | p > 0.05   |

PMS/PMDD was diagnosed using prospective methods; CES-D - The Center for Epidemiologic Studies Depression Scale; OC - oral contraceptive; SDs are given in square brackets;  $\chi^2$  - Fisher's exact test;
